# Supplementary material for: Hybrid Al2O3/bio-TiO2 nanocomposite impregnated thermoplastic polyurethane (TPU) nanofibrous membrane for fluoride removal from aqueous solutions
Source: Royal Society of Chemistry journal article supplement (doi:10.1039/c5ra02523k), 2015-01-01
Supplement: c5ra02523k1.pdf [file c5ra02523k1.pdf]

## Supplementary information

**Table S1** Properties of the TPU nanofiber and ABN/TPU-NFM

| S. no | Properties                  | Control TPU nanofiber | Al <sub>2</sub> O <sub>3</sub> /TiO <sub>2</sub> impregnated TPU nanofiber |
|-------|-----------------------------|-----------------------|----------------------------------------------------------------------------|
| 1.    | Thickness (μm)              | 21.7 ± 2.08           | 21.9 ± 1.3                                                                 |
| 2.    | Weight (g/cm <sup>2</sup> ) | 0.02 ± 0.3            | 0.02 ± 0.7                                                                 |
| 3.    | Swelling ratio (%)          | 6.8 ± 1.11            | 6.0 ± 0.7                                                                  |
| 4.    | Porosity (%)                | 48 ± 4                | 43 ± 4.3                                                                   |

**Table S2** First order and second order kinetics for F<sup>-</sup> adsorption by ABN

| Initial F <sup>-</sup> conc (mg/L) | q <sub>e</sub> (exp) (mg/g) | First order kinetic model |                             |                | Second order kinetic model |                              |                |
|------------------------------------|-----------------------------|---------------------------|-----------------------------|----------------|----------------------------|------------------------------|----------------|
|                                    |                             | k <sub>1</sub> (L/ min)   | q <sub>e</sub> (cal) (mg/g) | R <sup>2</sup> | k <sub>2</sub> (g/mg/min)  | q <sub>e</sub> (cal) (mg/ g) | R <sup>2</sup> |
| 2.0                                | 1.456                       | 0.064                     | 1.786                       | 0.909          | 0.572                      | 1.475                        | 0.999          |
| 4.0                                | 2.463                       | 0.083                     | 1.303                       | 0.967          | 0.320                      | 2.500                        | 0.999          |
| 6.0                                | 2.956                       | 0.094                     | 1.416                       | 0.95           | 0.337                      | 2.994                        | 0.999          |
| 8.0                                | 2.806                       | 0.085                     | 1.021                       | 0.94           | 0.549                      | 2.833                        | 0.999          |
| 10.0                               | 2.566                       | 0.076                     | 1.766                       | 0.853          | 0.978                      | 2.577                        | 0.999          |

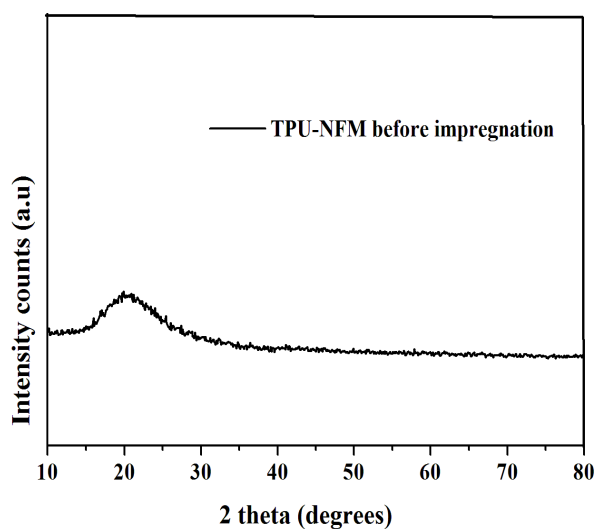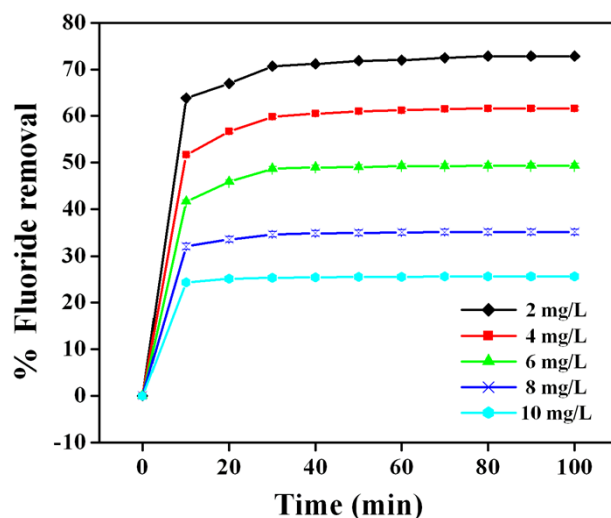

**Fig. S1** XRD pattern of TPU-NFM before ABN impregnation

**Fig. S2** Effect of contact time and initial concentration on F<sup>-</sup> adsorption by ABN (Adsorbent dosage: 0.2 g/200mL of F<sup>-</sup>; pH: 7; temp: 30±2 °C)
